# Supplementary material for: Hexamethyldisilazane-assisted synthesis of indium sulfide nanoparticles
Source: Royal Society of Chemistry journal article supplement (doi:10.1039/c1jm11167a), 2011-01-01
Supplement: c1jm11167a.pdf [file c1jm11167a.pdf]

# Hexamethyldisilazane Assisted Synthesis of Indium Sulfide Nano Particles

Baskaran Ganesh Kumar and Krishnamurthi Muralidhnan\*  
*School of Chemistry, University of Hyderabad, Hyderabad - 500046, India.*

## Electronic Supplementary Information

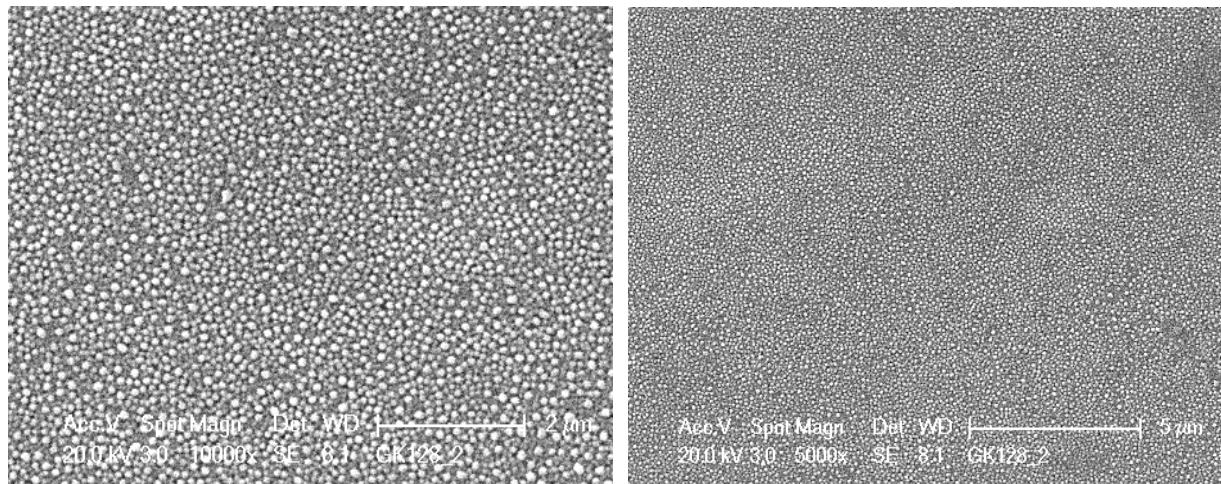

**Fig. S1** Scanning electron micrographs of  $\beta$ - $\text{In}_2\text{S}_3$  NPs

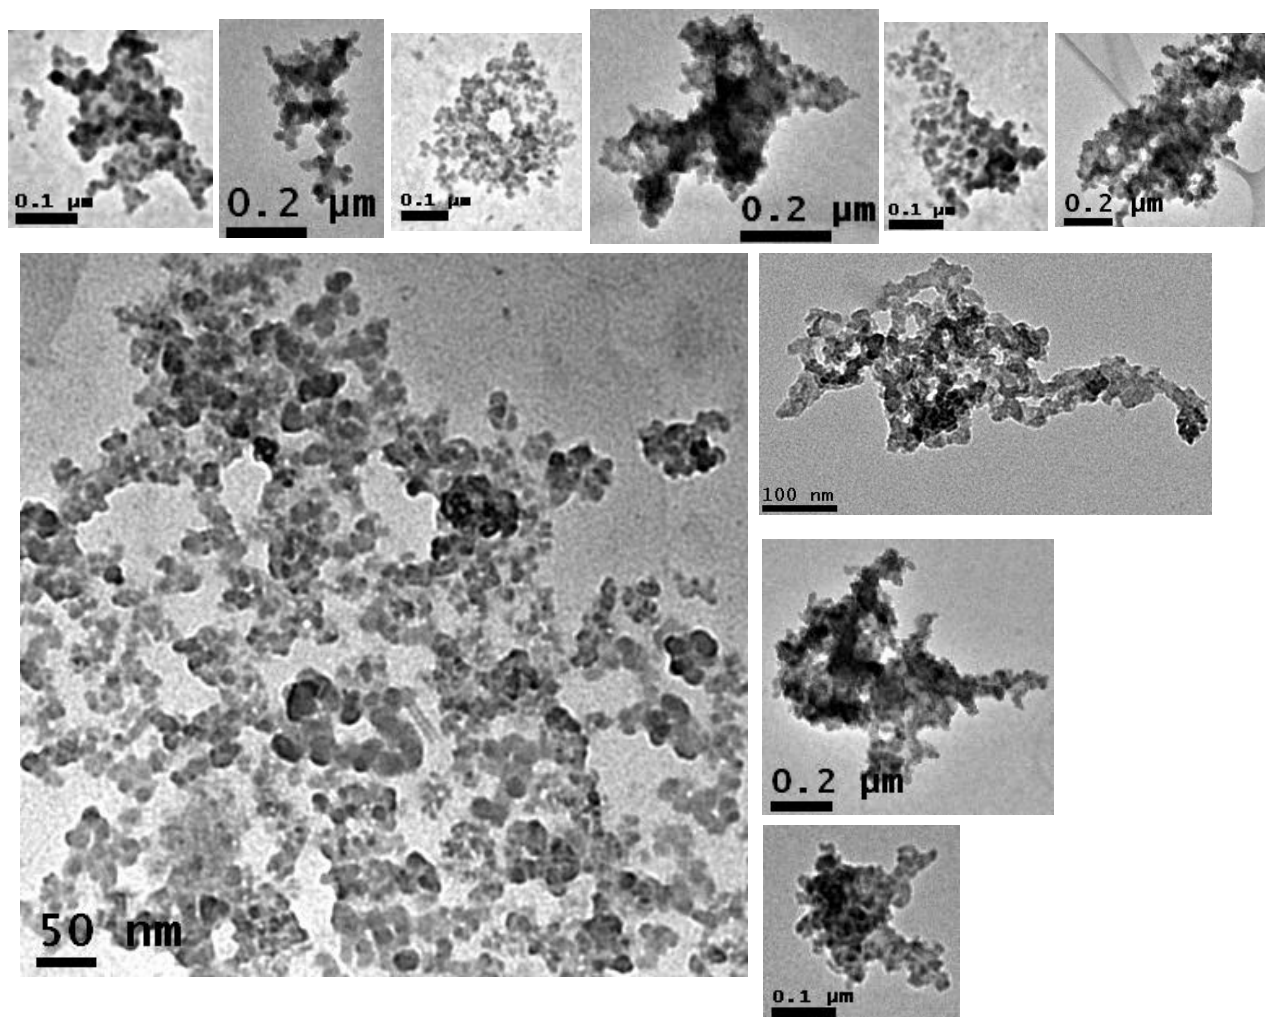

Fig. S2 TEM images of the concentrated samples (due to smaller size of NPs aggregates were observed)

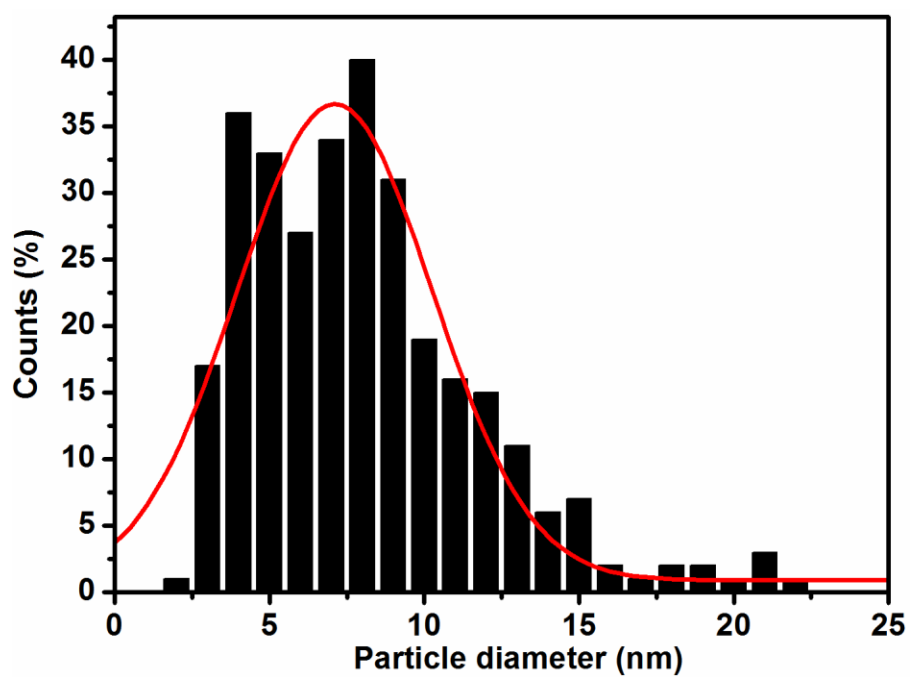

Fig. S3 Particle size distribution of  $\beta$ - $\text{In}_2\text{S}_3$  NPs (calculated from the diluted sample)

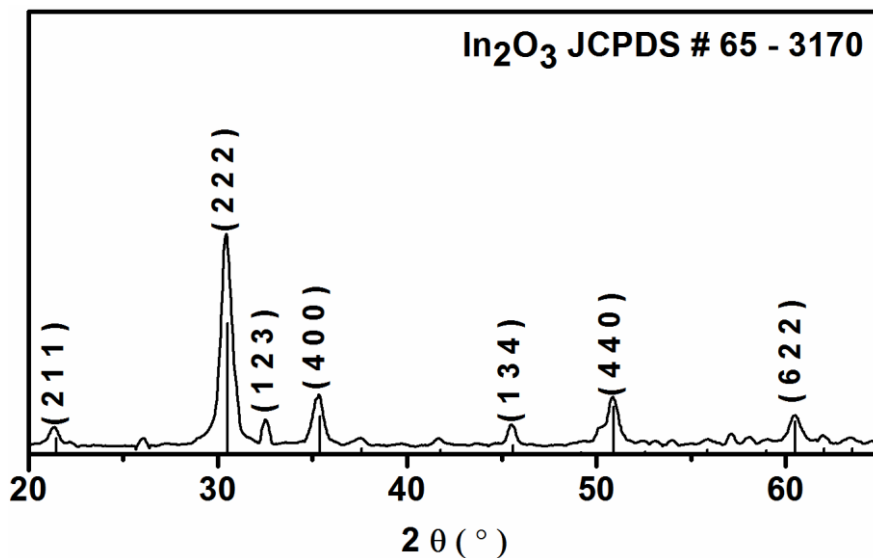

**Fig. S4** PXRD pattern of 700 °C heated  $\beta\text{-In}_2\text{O}_3$  NPs (compared with standard)

Average diameter  $d_{av} = 8.08 \pm 3.76$  nm

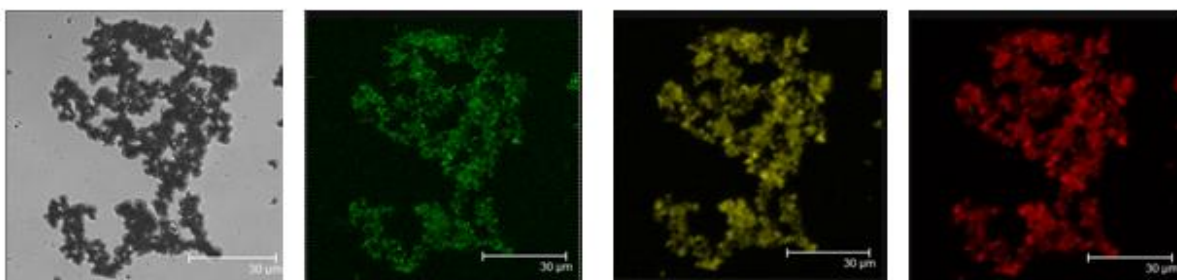

**Fig. S5** Representative Fluorescence images of the  $\beta\text{-In}_2\text{S}_3$  NPs

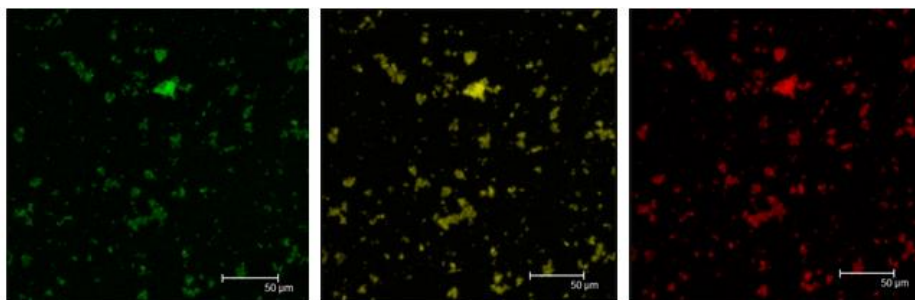

**Fig. S6** Fluorescence images (explaining emission of every particle in all three regions)

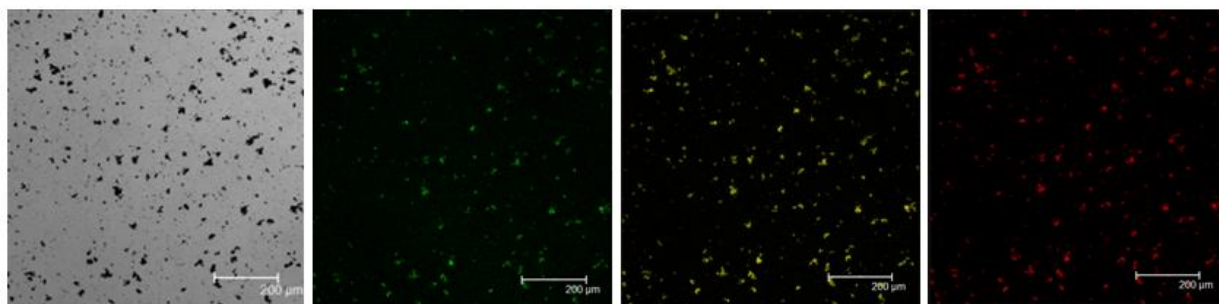

**Fig. S7** Large area fluorescence images

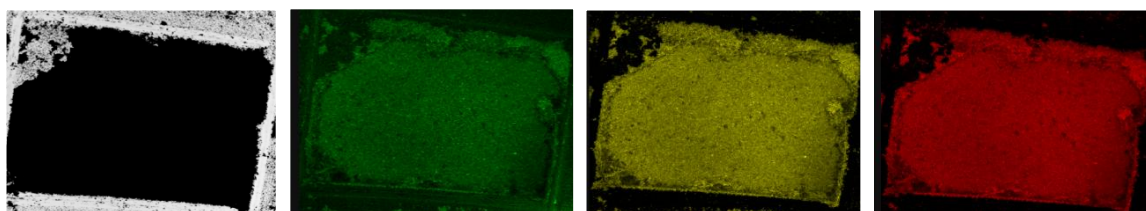

**Fig. S8** Fluorescence images of coated film.
